# Supplementary material for: Dynamic tailorable local luminescence patterns on single upconversion fluoride microcrystalsvia in situoxidation through laser irradiation
Source: Royal Society of Chemistry journal article supplement (doi:10.1039/c9tc04148f), 2019-01-01
Supplement: c9tc04148f1.pdf [file c9tc04148f1.pdf]

Supporting Information

**Dynamic tailorable local luminescence patterns on single  
upconversion fluoride microcrystals via in situ oxidation through  
laser irradiation**

Dangli Gao,<sup>\*ab</sup> Dan Zhao,<sup>a</sup> Hong Xin,<sup>a</sup> Anjiang Cai,<sup>b</sup> Xiangyu Zhang<sup>c</sup>

*a. College of Science, Xi'an University of Architecture and Technology, Xi'an,  
Shaanxi 710055, China*

*b. Shaanxi Key Laboratory of Nano Materials and Technology, Xi'an, Shaanxi  
710055, China*

*c. College of Science, Chang'an University, Xi'an, Shaanxi 710064, China*

**Corresponding Authors**

\* gaodangli@163.com;

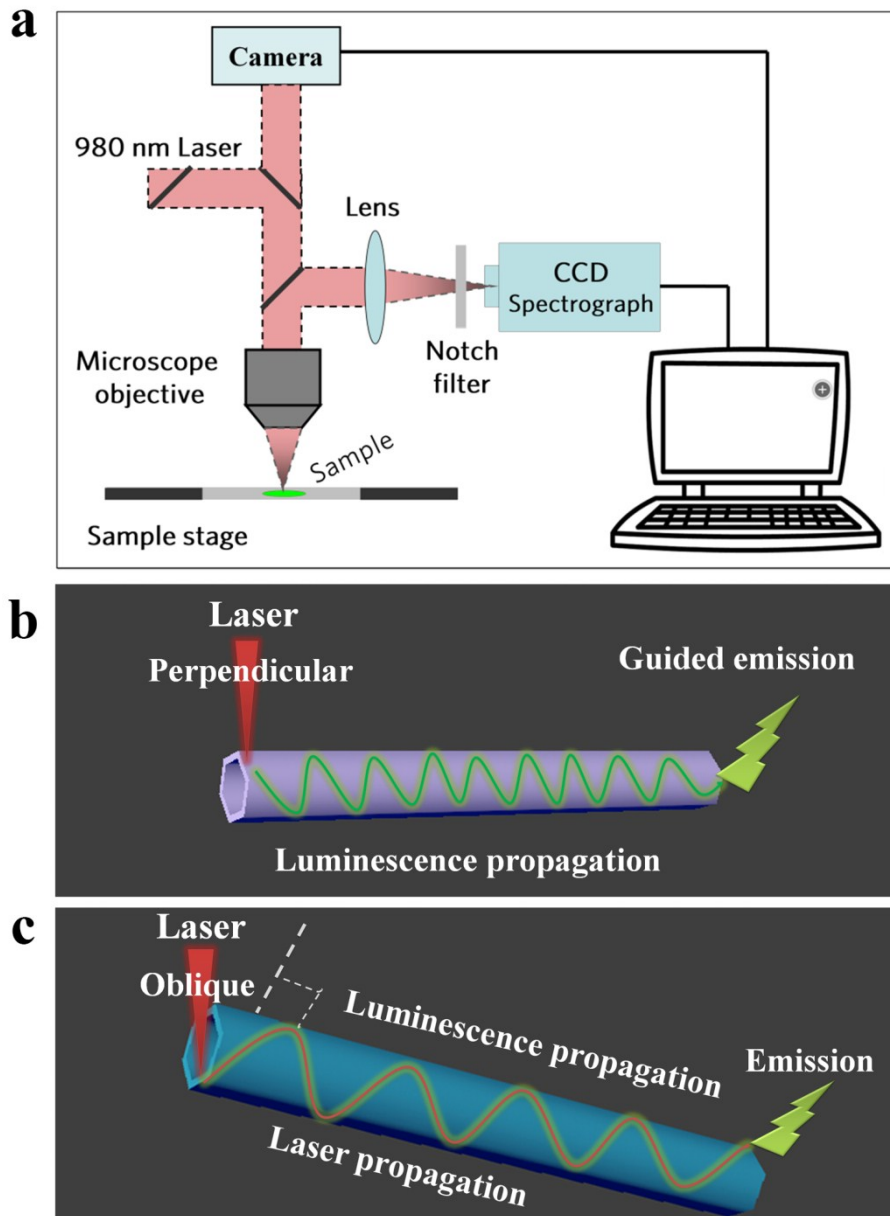

**Figure S1** Specific single-particle confocal experimental devices (a), schematic of excitation approach for the spot-excitation approach (b) and the waveguiding-excitation approach (c).

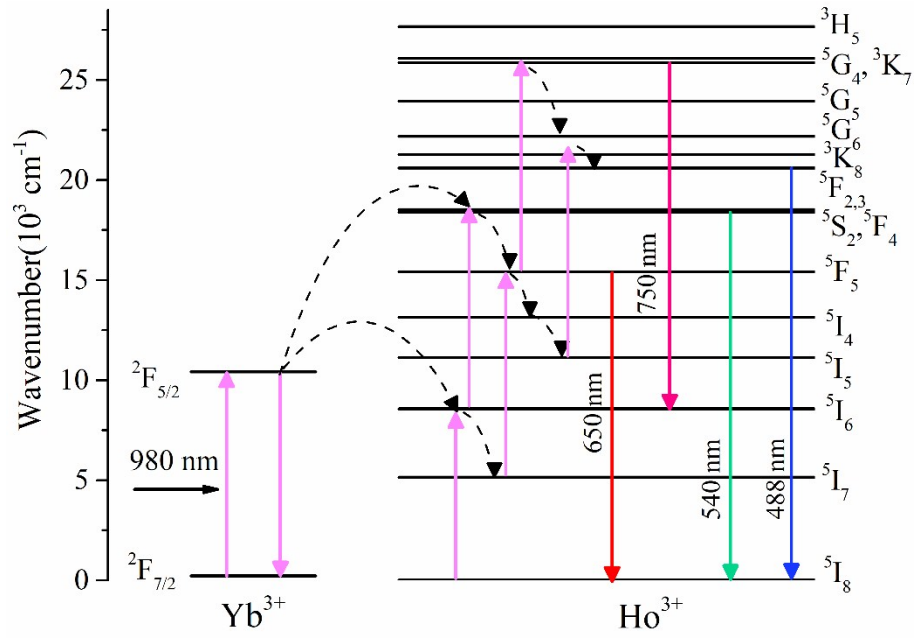

**Figure S2** Simplified energy level diagrams of  $\text{Yb}^{3+}$  and  $\text{Ho}^{3+}$  ions and proposed upconversion mechanisms for  $\text{NaYbF}_4:\text{Ho}$  microtube.

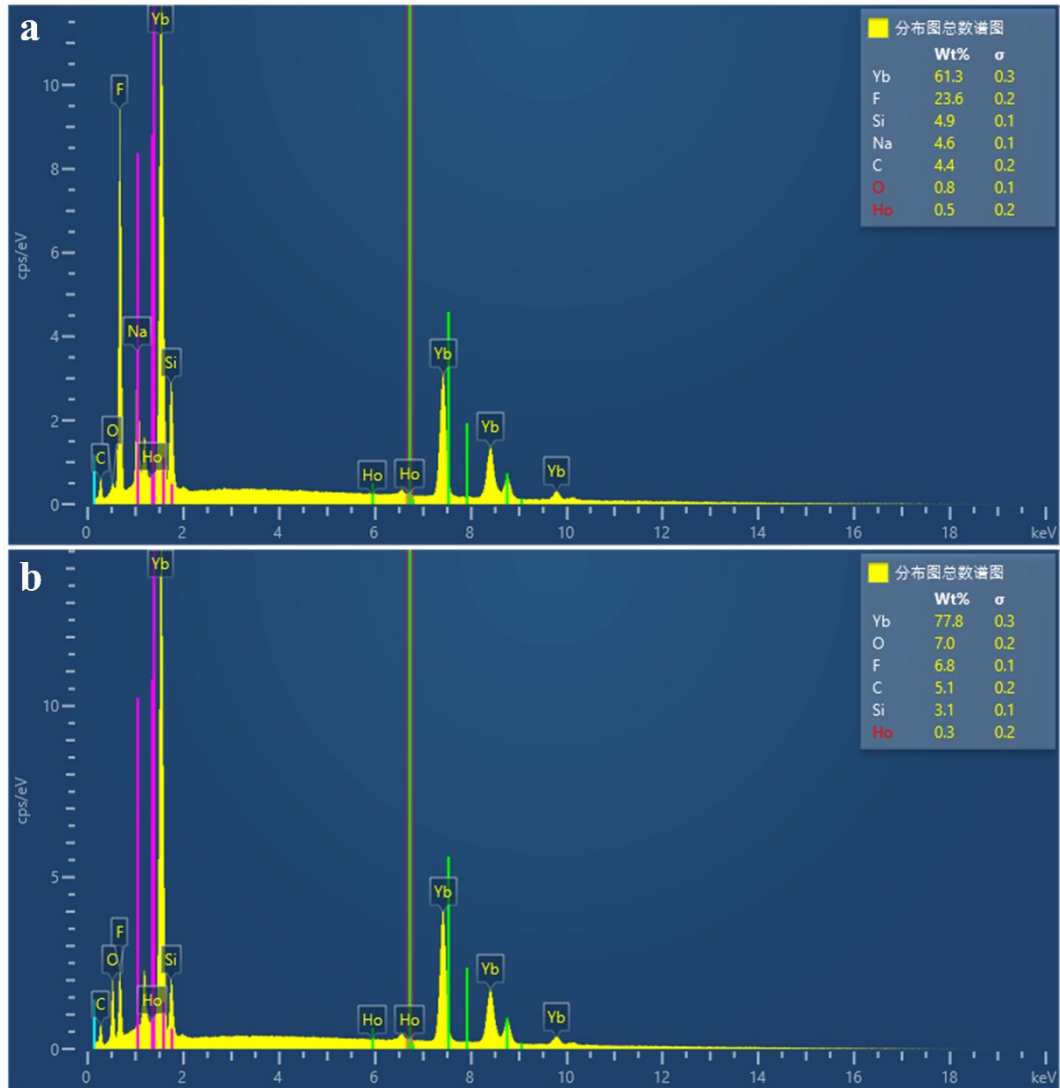

**Figure S3** EDX spectra of NaYbF<sub>4</sub>:Ho microtube before and after laser irradiation by a femtosecond laser with a power density of 15 mJ/cm<sup>2</sup> per pulse. Therein, (a) primitive NaYbF<sub>4</sub>:Ho microtube, (b) NaYbF<sub>4</sub>:Ho microtube after laser irradiation.

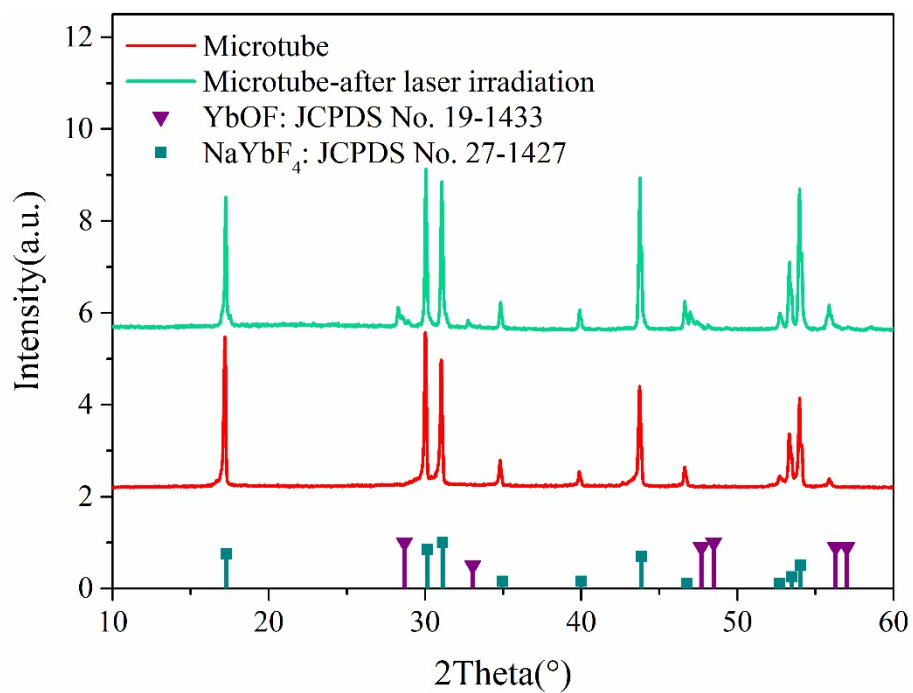

Fig. S4 XRD pattern of NaYbF<sub>4</sub>:2% Ho<sup>3+</sup> microtube before and after irradiation by laser with a power density of 15 mJ/cm<sup>2</sup> per pulse. The bottom panels are standard data for hexagonal NaYF<sub>4</sub> (JCPDS file number 27-1427) and hexagonal YbOF (JCPDS file number 19-1433).

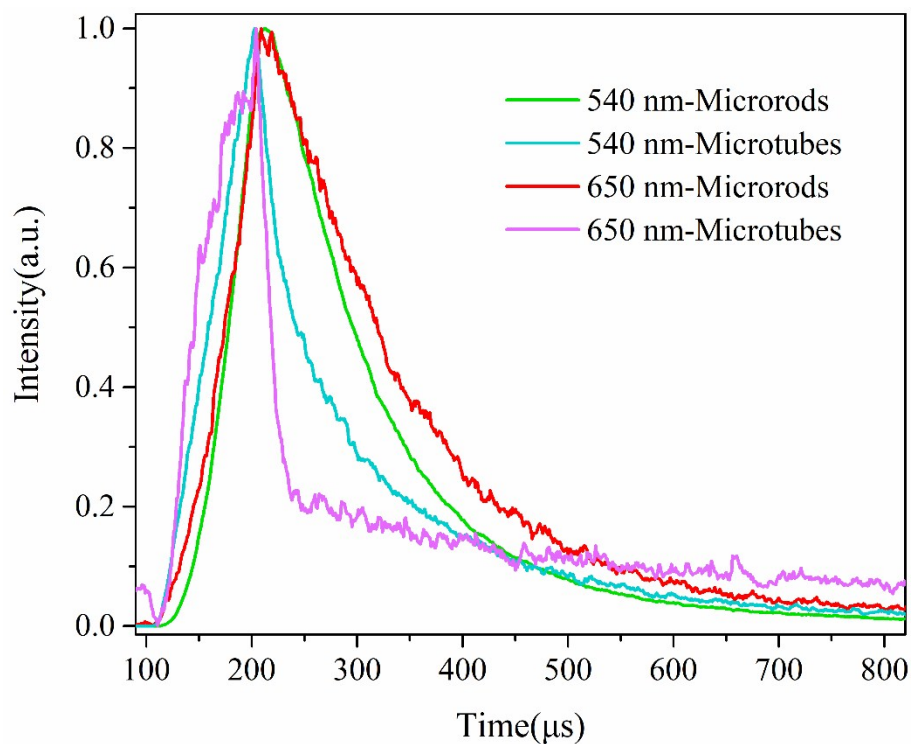

Fig. S5 The normalized luminescence decay curves for NaYbF<sub>4</sub>:Ho microrods and microtubes with the similar size under a 980 nm laser excitation. The corresponding monitoring wavelength is marked in the map. The longer luminescent lifetime of NaYbF<sub>4</sub>:Ho microrods indicates the higher crystal quality.

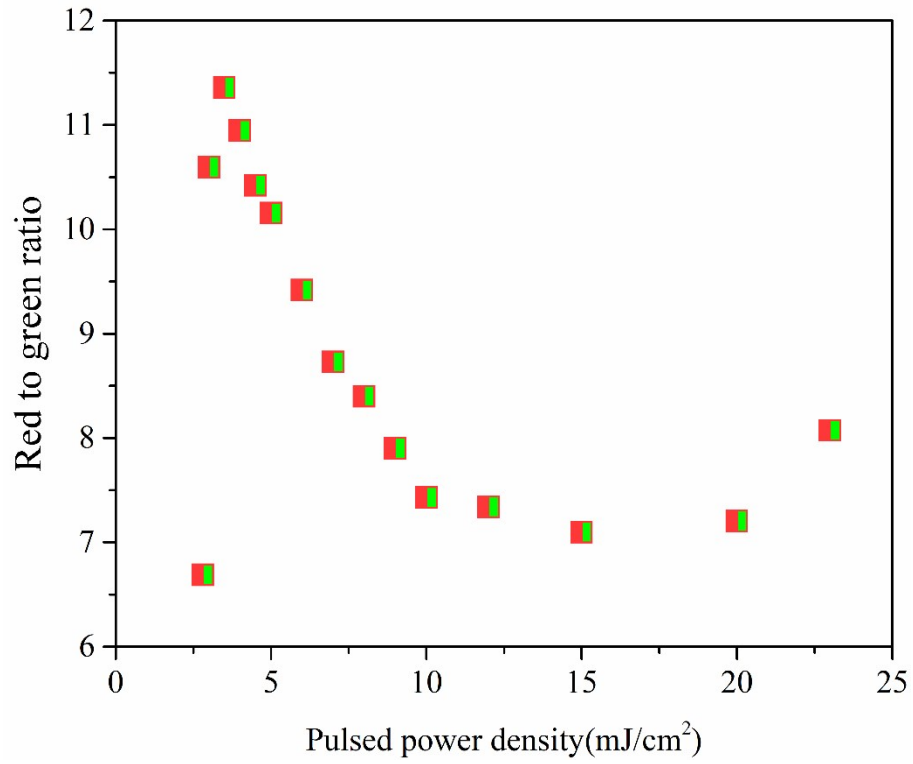

Fig. S6 The red-to-green ratio of upconversion luminescence intensities excited by a femtosecond laser of 980 nm wavelength with different pulsed power densities.
